# Supplementary material for: High throughput metabolomics-proteomics investigation on metabolic phenotype changes in rats caused byRadix Scrophulariaeusing ultra-performance liquid chromatography with mass spectrometry
Source: Royal Society of Chemistry journal article supplement (doi:10.1039/c8ra10443c), 2019-01-01
Supplement: c8ra10443c1.pdf [file c8ra10443c1.pdf]

## APPENDIX

Table S1 Effect of Scrophulariae Radix Extract on Liver Index of Acute Liver Injury Induced by CCL4 ( $\bar{x} \pm s$ , n=8)

| Groups                 | Dose (g/kg) | Liver index (%)         |
|------------------------|-------------|-------------------------|
| Control group          | —           | 3.04±0.10               |
| CCL4 model group       | —           | 4.46±0.41 <sup>▲▲</sup> |
| Full composition group | 1.35        | 3.99±0.32 <sup>★</sup>  |

Note: the CCL4 model group vs control group, <sup>▲</sup>P<0.05, <sup>▲▲</sup>P<0.01; the Full composition group vs CCL4 model group, <sup>★</sup>P<0.05, <sup>★★</sup>P<0.01.

Table S2 Effects of Scrophulariae Radix Extract on serum ALT and AST in rats with acute liver injury induced by CCL4 ( $\bar{x} \pm s$ , n=8)

| Groups                 | Dose (g/kg) | ALT(U/L)                   | AST(U/L)                     |
|------------------------|-------------|----------------------------|------------------------------|
| Control group          | —           | 12.20±1.98                 | 91.93±23.56                  |
| CCL4 model group       | —           | 570.11±83.17 <sup>▲▲</sup> | 1071.32±160.76 <sup>▲▲</sup> |
| Full composition group | 1.35        | 245.23±65.43 <sup>★★</sup> | 418.39±93.52 <sup>★★</sup>   |

Note: the CCL4 model group vs control group, <sup>▲</sup>P<0.05, <sup>▲▲</sup>P<0.01; the Full composition group vs CCL4 model group, <sup>★</sup>P<0.05, <sup>★★</sup>P<0.01.

Table S3 Effects of aqueous extract of Scrophulariae on SOD, GSH-Px activity and MDA content in rats with acute liver injury induced by CCL4 ( $\bar{x} \pm s$ , n=8)

| Groups                 | Dose (g/kg) | SOD(U/mg)                  | GSH-Px                    | MDA(nmol/mg)            |
|------------------------|-------------|----------------------------|---------------------------|-------------------------|
| Control group          | —           | 126.65±13.56               | 347.12±55.70              | 0.81±0.36               |
| CCL4 model group       | —           | 71.33±12.50 <sup>▲▲</sup>  | 265.62±62.30 <sup>▲</sup> | 1.87±0.32 <sup>▲▲</sup> |
| Full composition group | 1.35        | 106.55±16.65 <sup>★★</sup> | 327.33±44.46 <sup>★</sup> | 1.59±0.27               |

Note: the CCL4 model group vs control group, <sup>▲</sup>P<0.05, <sup>▲▲</sup>P<0.01; the Full composition group vs CCL4 model group, <sup>★</sup>P<0.05, <sup>★★</sup>P<0.01.

Pathological study of rat liver tissue

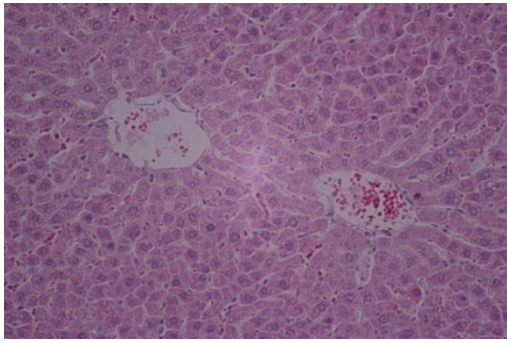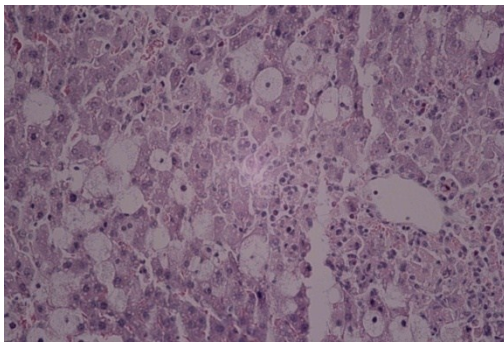

(A2) Control group HE×400

(B2) CCL4 model group HE×400

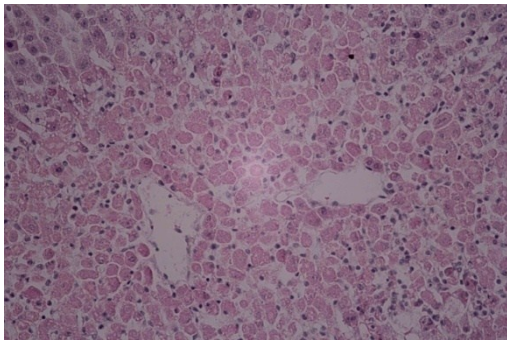

(C2) Full composition group HE×400

Fig. S1 Effect of aqueous extract of Scrophulariae on liver histopathology in rats with acute liver injury
